# Supplementary material
Source: PubMed Central journal article supplement (PMC545540)
Supplement: pnas_102_3_725__1.pdf [file pnas_102_3_725__1.pdf]

HERV-Rb -----RNISLALEDTCRQIQVISSSALS LHDWIASQFSGRPS  
 HERV-R -----KVIKEITAKIQKLAHIPVQTWKGZ-----SPDSLFR  
 IAPE -----WTHAANLSKELSLF L TGNWSEGFDEKLEALRTVM T INSTRVDP SLIDG I KGLS  
 HIV1 --LEQIWNNMTWMEWDREINNYTSLIHS LIEESQNQQEKNEQELLELDK WASLWNWFNIT

syncytin-B WLP-WLTPFLGPL---LFLFFLLTFGSCLL-  
 syncytin-A WLPSWLTSLMAPI---LFILVLLVFRPCLL-  
 HERV-F KIIAWVIPFLGPL---LIICLGLMFLPCLI-  
 HERV-H NWMSWVLPVIVSPL---IPIFLLLLFGPCIF-  
 HERV-9 -WATLPLPFLGPV---AAI L L L L L L AFGPCIF-  
 HERV-FRD KWFSWVLP L TGPL---V S L L L L L L L F G P C L L -  
 HERV-Fc PLTTWIIPFISPI---LIIC L L L L L I A P C V L -  
 HERV-W QWMPWILPFLGPL---AAI I L L L L L L F G P C I F -  
 MmERV WLT T L L S T I A G P L --- I T L M L L L T F G P C I L -  
 MuRVY CFT T L I S T L A G P L --- I I F F L L L S F G P C I L -  
 endoMLV WFT T L I S T I M G P L --- I V L L M I L L F G P C I L -  
 MuRRS CLT T L I S T L M G P L --- I I L L L L L T C G P L I L -  
 GLN WITSLISAVAGPI---LMICLALVFGPCII-  
 HERV-T WLT T L I T G L A G P L --- L I L L L S L I F G P C I L -  
 endoMMTV DWTQYFIFIGAGA---LLLVI V L M I F P I V --  
 HERV-K TWVK T I G S T T I I N --- L I L I L V C L F C L L L V -  
 HERV-Rb WWQKILIVLATLWSVGIALCCGLYFCRMFSQ  
 HERV-R GWFLSLGGFKTLVQIVLAILGVCLILPCLL-  
 IAPE SWMSSVFSHFQWVG-VGLFGATLCCGLVF-  
 HIV1 NWLWYIKIFIMIVGGLVGLRIVFAVLSIV-
